# Supplementary material
Source: HighWire-hosted journal article supplement (https://ijgc.bmj.com/highwire/filestream/18159/field_highwire_adjunct_files/0/ijgc-2020-001991supp001_data_supplement.pdf)

## Supplementary Materials

**Appendix 1: Search Strategy**

## PubMed

(VTE[tiab] OR venous thromboembolism[tiab] OR DVT[tiab] OR deep vein thrombosis[tiab] OR PE[tiab] OR pulmonary embolism[tiab] OR “thromboembolism”[MeSH])

AND

(prevention[tiab] OR prophylaxis[tiab] OR lovenox[tiab] OR heparin[tiab] OR enoxaparin[tiab] OR anticoagulant[tiab] OR anticoagulants[MeSH] OR mechanical[tiab] OR “heparin”[MeSH] OR tinzaparin[tiab] OR dalteparin[tiab] OR Fragmin[tiab] OR Innohep[tiab])

AND

(Gynecolog\*[tiab] OR Gynaecolog\*[tiab] OR Gynecologic Oncolog\*[tiab] OR “gynecology”[MeSH] OR “Genital Neoplasms, Female/surgery”[MeSH])

NOT

(obstetric\*[tiab] OR cesarean[tiab])

## EMBASE

(VTE:ti,ab OR ‘venous thromboembolism’:ti,ab OR DVT:ti,ab OR ‘deep vein thrombosis’:ti,ab OR PE:ti,ab OR ‘pulmonary embolism’:ti,ab OR ‘venous thromboembolism’/mj)

AND

(prevention:ti,ab OR prophylaxis:ti,ab OR lovenox:ti,ab OR heparin:ti,ab OR enoxaparin:ti,ab OR anticoagulant:ti,ab OR ‘anticoagulant agent’/mj OR mechanical:ti,ab OR ‘heparin derivative’/mj OR tinzaparin:ti,ab OR dalteparin:ti,ab OR Fragmin:ti,ab OR Innohep:ti,ab)

AND

(Gynecolog\*:ti,ab OR Gynaecolog\*:ti,ab OR Gynecologic Oncolog\*:ti,ab OR ‘gynecologic disease’/mj OR ‘female genital tract tumor’/mj)

NOT

(obstetric\*:ti,ab OR cesarean:ti,ab)

Table 2. Quality assessment of the included studies

| First author      | Selection        | Comparability | Exposure | Quality Assessment |
|-------------------|------------------|---------------|----------|--------------------|
| Ailawadi          | ***              | **            | **       | High               |
| Bouchard-Fourtier | ***              | -             | **       | Poor               |
| Clarke-Pearson    | ***              | **            | ***      | High               |
| Corr              | **               | **            | **       | High               |
| Einstein          | ***              | *             | ***      | High               |
| Freeman           | ***              | **            | ***      | High               |
| Hansen            | ***              | **            | ***      | High               |
| Hopp              | **               | *             | -        | Poor               |
| Maxwell           | RCT 3/5<br>Jadad |               |          |                    |
| Pelkofski         | ***              | **            | -        | Poor               |
| Piver             | ***              | -             | *        | Poor               |
| Renata            | ***              | -             | *        | Poor               |
| Swenson           | ***              | -             | **       | Poor               |
| Ugaki             | ****             | -             | -        | Poor               |
| Whitworth         | ***              | -             | *        | Poor               |

Figure 5. Forest plot of subgroup analysis comparing preoperative use of UFH versus LMWH as pre-operative chemoprophylaxis.

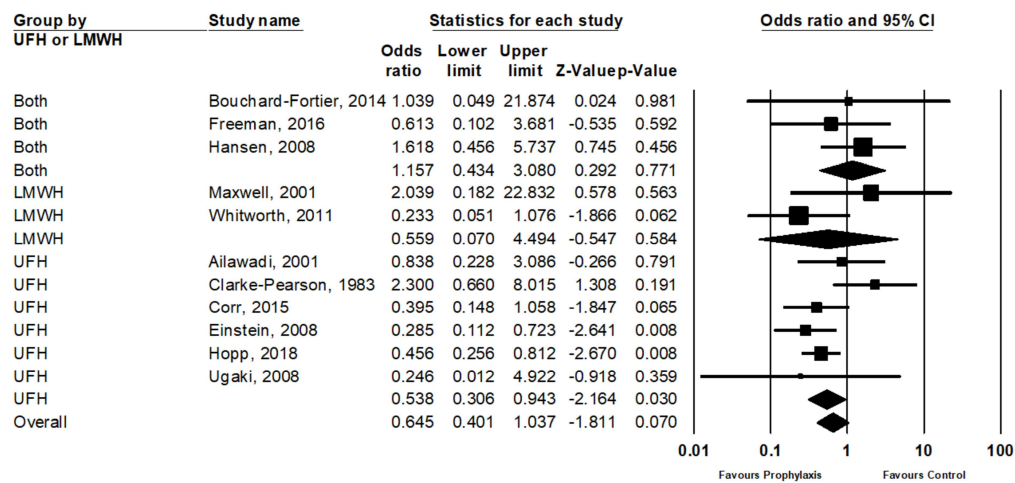

**Figure 6. Forest plot of subgroup analysis of VTE comparing pre-operative chemoprophylaxis by those studies that controlled for post-operative prophylaxis (equivalent post-operative care) and those that did not (non-equal post-operative care)**

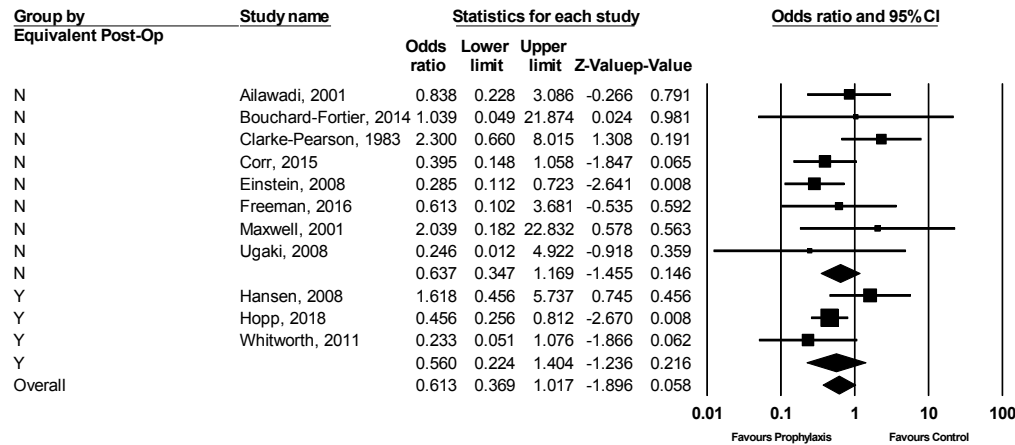

**Figure 7. Forest plot of subgroup analysis of VTE by studies with concurrent use of sequential compression devices (SCD) or not.**

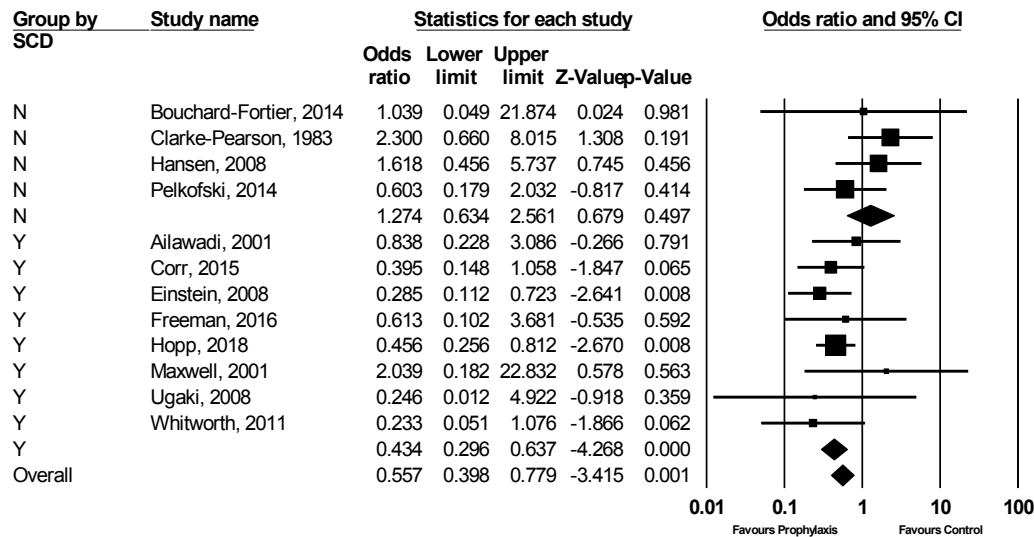

**Figure 8. Forest plot of subgroup analysis according to quality of studies**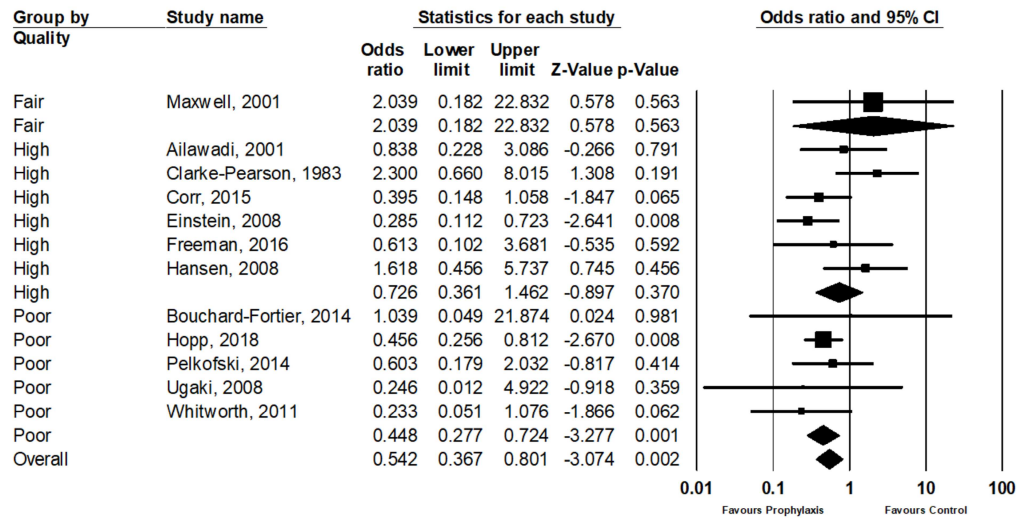

Supplement: ijgc-2020-001991supp001_data_supplement.pdf [file ijgc-2020-001991supp001_data_supplement.pdf]
